# Supplementary material for: Cure Kinetics of Samarium-doped Fe3O4/Epoxy Nanocomposites
Source: Preprints.org preprint supplement (doi:10.20944/preprints202112.0102.v1), 2021-12-07
Supplement: Supplementary file 1 [file supplementary]

***Supplementary information to:***

Cure Kinetics of Samarium-doped Fe3O4/Epoxy Nanocomposites

Maryam Jouyandeha, Mohammad Reza Ganjalia,b,c, Mehdi Mehrpooyad, Otman Abidae, Karam Jabboure, Navid Rabieef, Sajjad Habibzadehg, Amin Hamed Mashahdzadehh, Alberto García-Peñasi,j, Florian J. Stadleri, Mohammad Reza Saebk,*

a Center of Excellence in Electrochemistry, School of Chemistry, University of Tehran, Tehran, 14176-14411, Iran; [maryam.jouyande@gmail.com](mailto:maryam.jouyande@gmail.com) (M.J.) and [ganjali@ut.ac.ir](mailto:ganjali@ut.ac.ir) (M.R.G.)

b School of Resources and Environment, University of Electronic Science and Technology of China, Chengdu, 611731, China

c Biosensor Research Center, Endocrinology and Metabolism Molecular-Cellular Sciences Institute, Tehran University of Medical Sciences, Tehran, 14117-13137, Iran

d Department of Renewable Energies and Environment, Faculty of New Sciences and Technologies, University of Tehran, Tehran, Iran [mehrpoya@ut.ac.ir](mailto:mehrpoya@ut.ac.ir) (M.M.)

e College of Engineering and Technology, American University of the Middle East, Kuwait; [otman.abida@aum.edu.kw](mailto:otman.abida@aum.edu.kw) (O.A.) and [karam.jabbour@aum.edu.kw](mailto:karam.jabbour@aum.edu.kw) (K.J.)

f Department of Physics, Sharif University of Technology, Tehran, 11155-9161, Iran; [nrabiee94@gmail.com](mailto:nrabiee94@gmail.com) (N.R.)

g Department of Chemical Engineering, Amirkabir University of Technology (Tehran Polytechnic), Tehran, 15916-34311, Iran; [sajjad.habibzadeh@aut.ac.ir](mailto:sajjad.habibzadeh@aut.ac.ir) (S.H.)

h Mechanical and Aerospace Engineering, School of Engineering and Digital Sciences, Nazarbayev University, Nur-Sultan 010000, Kazakhstan; [amin.hamed.m@gmail.com](mailto:amin.hamed.m@gmail.com) (A.H.M.)

i College of Materials Science and Engineering, Guangdong Research Center for Interfacial Engineering of

Functional Materials, Nanshan District Key Laboratory for Biopolymers and Safety Evaluation, Shenzhen Key

Laboratory of Polymer Science and Technology, Lihu Campus, Shenzhen University, Shenzhen 518055, China; [alberto.garcia.penas@uc3m.es](mailto:alberto.garcia.penas@uc3m.es) (A.G-P.) and fjstadler@szu.edu.cn (F.J.S.)

j Departamento de Ciencia e Ingeniería de Materiales e Ingeniería Química (IAAB), Universidad Carlos III de Madrid, 28911 Leganés, Madrid, Spain

k Department of Polymer Technology, Gdańsk University of Technology, G. Narutowicza 11/12 80-233, Gdańsk, Poland; [mrsaeb2008@gmail.com](mailto:mrsaeb2008@gmail.com) (M.R.S.)

***Friedman model***

By plotting *vs*. 1/T*α* from Eq. (S1), the value of *Eα* is obtained from the slope of Figure S1.

| , | (S1) |
| --- | --- |





**Figure S1.** Arraysof*ln(dα/dt)* plots *vs.* 1/T as typical plots obtained for the studied samples using Friedman model at *β*= 2.5 ˚C/min.

***KAS method***

Plotting *vs*. 1/*Tα* from Eq. (S2) for each α value gives a value for the *Eα* (Figure S2).

| , | (S2) |
| --- | --- |





**Figure S2.** Arraysof ln(β/T2) plots vs. 1/T as typical plots obtained for the studied samples using *KAS* model.

***Friedman model***

This method can be applied on experimental data using Eq. (S3). The shape of the plot of *ln*[*Af(α)*] *vs.* *ln*(1-*α*) can be used to determine whether or not the cure reaction has roots in autocatalytic reaction mechanism (Figure S3).

| , | (S3) |
| --- | --- |





**Figure S3.** Arraysof*ln [Af(α)]* plots vs. *ln(1-α)* as typical plots obtained for the studied samples using *Friedman* model.

A more accurate *Malek* method was also used for determination of kinetic model by considering the maximum points of Malek parameters of *y(α) = (αm), z(α) = (αp∞)* which are defined in equations S2 and S3 respectively, and the conversion at the maximum point of DSC curves (*αp*).

| , | (S4) |
| --- | --- |
| , | (S5) |

The values of the *y(α)* and *z(α)* are normalized with respect to their maximum values to take values between 0 and 1 (see Figure S4).





**Figure S4.** The shape and alteration pattern of *y(α)* and *Z(α)* versus the extent of reaction captured by the Malek model.

A set of equations (S4 and S5) should be solved simultaneously to explore the triplet parameters of cure, i.e. (*n*, *m*, ln *A*) s:

| , | (S6) |
| --- | --- |
| , | (S7) |





**Figure S5.** Variation of Value I of the samples prepared in this work at typical heating rate of 2.5 °C/min





**Figure S6.** Variation of Value II of the samples prepared in this work at typical heating rate of 2.5 °C/min
